# Supplementary material for: Ectodysplasin A Pathway Contributes to Human and Murine Skin Repair
Source: PubMed Central journal article supplement (PMC4967474; doi:10.1016/j.jid.2015.09.002), 2016-05
Supplement: mmc1.pdf [file mmc1.pdf]

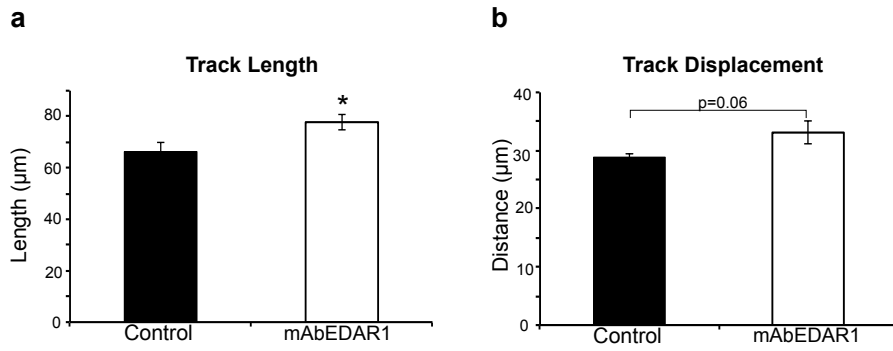

**Figure S1 Activation of Edar signalling increases cell motility.**

a, Total distance travelled over a period of 24 hours is significantly greater in mAbEDAR1 treated HaCaTs than control treated. b, Trend-towards increased directional cell motility upon activation of Edar signalling. Track displacement denotes distance between start and end position. Bar shows mean  $\pm$  SEM, n=3, \*P<0.05.
